# Supplementary material for: Functional analysis of tomato CHIP ubiquitin E3 ligase in heat tolerance
Source: PubMed Central journal article supplement (PMC7814054; doi:10.1038/s41598-021-81372-8), 2021-01-18
Supplement: 41598_2021_81372_MOESM1_ESM.pdf [file 41598_2021_81372_MOESM1_ESM.pdf]

# Functional Analysis of Tomato CHIP Ubiquitin E3 Ligase in Heat Tolerance

Yan Zhang<sup>a,\*</sup>, Xiaodong Lai<sup>a</sup>, Siqing Yang<sup>a</sup>, Huan Ren<sup>a</sup>, Jingya Yuan<sup>a</sup>, Huanchun Jin<sup>a</sup>, Chengchen Shi<sup>a</sup>, Zhibing Lai<sup>b</sup>, Gengshou Xia<sup>a</sup>

## Includes

**Supplementary Figure 1.** Expression pattern of *AtCHIP* in response to exogenous SA, JA and ABA.

**Supplementary Figure 2.** Ubiquitinated protein levels of soluble and insoluble proteins from *SICHIP*-, *SITPR28*-silenced and mock plants before and after heat stress.

**Supplementary Figure 3.** Increased insoluble ubiquitinated proteins in the *SICHIP*-silenced plants exposed to heat stress.

**Supplementary Table 1.** List of primers used in this study.

**Supplementary Table 2.** Accession numbers or transcript names of CHIP homologs from 18 animal and plant species.

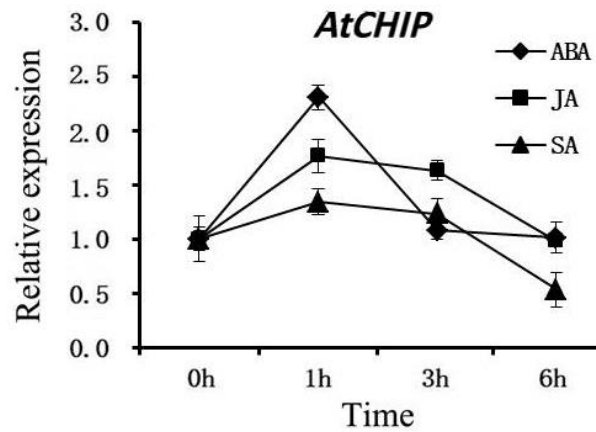

**Supplementary Figure 1. Expression of *AtCHIP* in response to exogenous SA, JA and ABA.**

Four-week-old *Arabidopsis* Col-0 plants were treated with 20  $\mu$ M SA, 100  $\mu$ M methyl jasmonate (MeJA) and 20  $\mu$ M ABA. At least 3 leaves from 3 individual plants for each sample were collected at indicated hours after treatment. Error bars indicate SE (n = 3). The experiment was repeated three times with similar results.

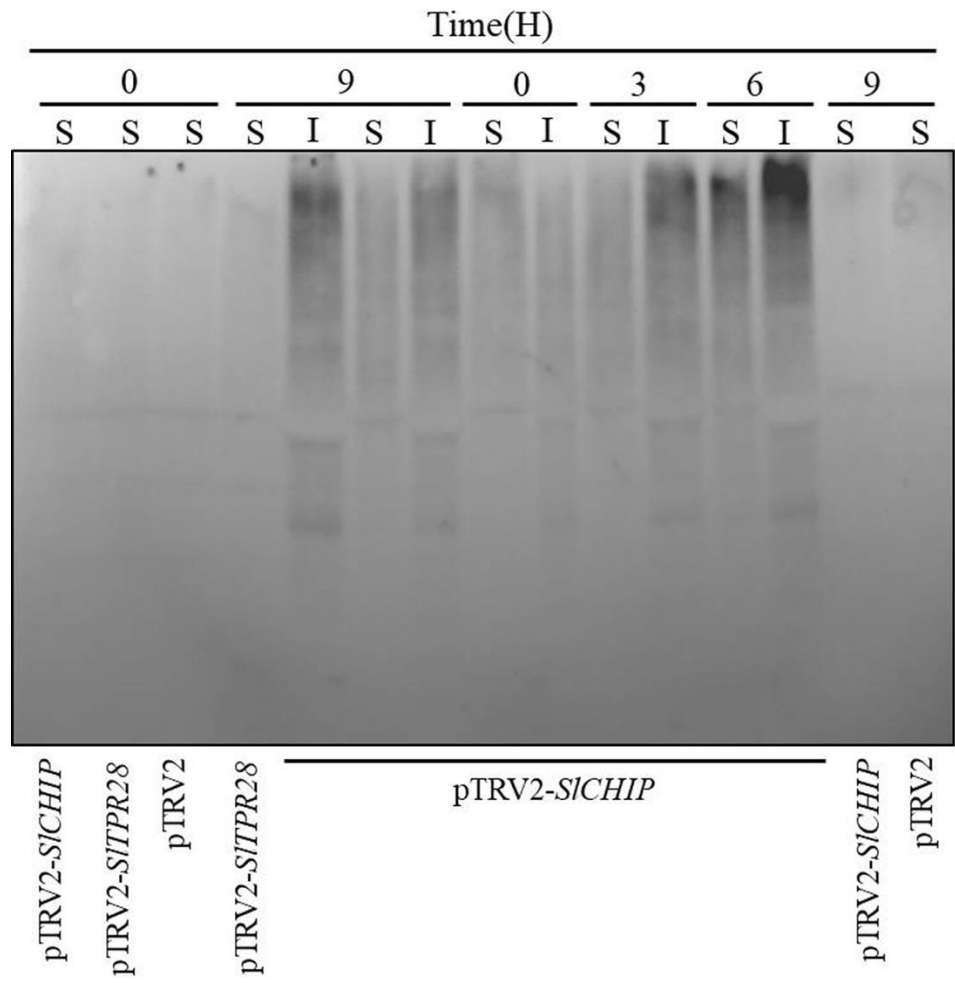

**Supplementary Figure 2. Ubiquitinated protein levels of soluble and insoluble proteins from *SICHIP*-, *SITPR28*-silenced and mock plants before and after heat stress.** The first supernatants as soluble protein and the last pellets as insoluble protein were subjected to SDS-PAGES and probed with anti-ubiquitin monoclonal antibody. The experiment was repeated three times with similar results. Samples from *SICHIP*-silenced plants after heat treatment for 3- and 6-hours were also collected and ubiquitinated levels of soluble and insoluble proteins from these samples were checked. S, soluble. I, insoluble.

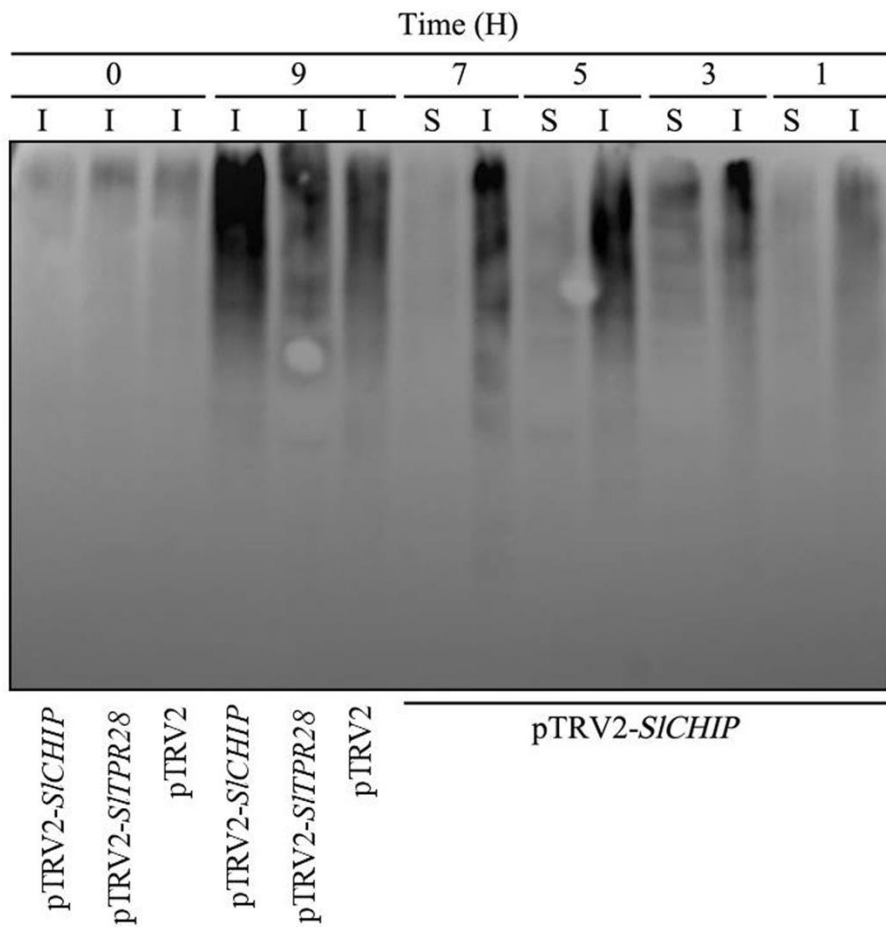

**Supplementary Figure 3. Increased insoluble ubiquitinated proteins in the *SICHP*-silenced plants exposed to heat stress.** The first supernatants as soluble protein and the last pellets as insoluble protein were subjected to SDS-PAGES and probed with anti-ubiquitin monoclonal antibody. The experiment was repeated three times with similar results. Samples from *SICHP* silenced plants after indicated hours of heat treatment were also collected and ubiquitinated levels of soluble and insoluble proteins from these samples were checked. S, soluble. I, insoluble.

**Supplementary Table 1. List of primers used in this study.**

| Primers           | Sequences (5'-3')                            | Size (bp) | Purpose                                                |
|-------------------|----------------------------------------------|-----------|--------------------------------------------------------|
| <b>Cloning</b>    |                                              |           |                                                        |
| SICHIP-C-F        | ATGGCACCAATCGTGGGTCAAAG                      | 831       | To gain 831 bp CDS of <i>SICHIP</i> for construct      |
| SICHIP-C-R        | CTATATCCTATATGCCAGCCAT                       |           | pMD18-T- <i>SICHIP1</i> .                              |
| SITPR28-C-F       | ATGGAGCTCGCCTTGGGGCCAT                       | 957       | To gain 957 bp CDS of <i>SITPR28</i> for construct     |
| SITPR28-C-R       | CTATTCTTGCTTGAATACACGCG                      |           | pMD18-T- <i>SICHIP2</i> .                              |
| <b>VIGS</b>       |                                              |           |                                                        |
| SICHIP-V-F        | GGGGTACC( <i>KpnI</i> )TTCTGCTCCTCCGCAC      | 286       | To gain 286 bp fragment of <i>SICHIP</i> mRNA for      |
| SICHIP-V-R        | CCCTCGAG( <i>XhoI</i> )AGCGCCAAACCGATTCT     |           | construct pTRV2- <i>SICHIP1</i> .                      |
| SITPR28-V-F       | GC TCTAGA( <i>XbaI</i> )ATACGAGGATGCCCTGG    | 364       | To gain 364 bp fragment of <i>SITPR28</i> CDS for      |
| SITPR28-V-R       | C GAGCTC( <i>SacI</i> )AGCTGGAGCGTACTTTT     |           | construct pTRV2- <i>SITPR28</i>                        |
| <b>Transgenic</b> |                                              |           |                                                        |
| SICHIP-T-F        | ATGGATCC( <i>BamHI</i> )ATGGCACCAATCGTGGGTTC | 847       | To gain 831 bp CDS of <i>SICHIP</i> for construct      |
| SICHIP-T-R        | ATCTCGAG( <i>XhoI</i> )TATCCTATATGCCAGCCATG  |           | pFGC5941- <i>SICHIP-3HA</i> .                          |
| <b>qRT-PCR</b>    |                                              |           |                                                        |
| SICHIP-Q-F        | TACTTTGTGCCCTAATGTTCCGATA                    | 159       | To test <i>SICHIP</i> transcript level in VIGS plants  |
| SICHIP-Q-R        | TGTAGCAATGCAAGACCAAGATAAT                    |           | or after treatment with SA, JA and ABA.                |
| SITPR28-Q-F       | ACCCATCAAACGCCACTCTTTACAG                    | 171       | To test <i>SITPR28</i> transcript level in VIGS plants |
| SITPR28-Q-R       | CATCCTCGTATCGTTCCATAGCCTC                    |           | or after treatment with SA, JA and ABA.                |
| SIACTIN7-Q-       | TGAGCTTCGAGTTGCTCCTGA                        | 144       | To be used as reference gene.                          |
| SIACTIN7-Q-       | AGCACAGCCTGGATAGCAACA                        |           |                                                        |
| AtCHIP-Q-F        | TTTGGTGCTGCCATTGATGC                         | 175       | To test <i>AtCHIP</i> transcript level after treatment |
| AtCHIP-Q-R        | GCATGTAGTGTGCCTTGACG                         |           | with SA, JA and ABA.                                   |
| AtACTIN2-F        | GCTGTTGACTACGAGCAGGA                         | 143       | To be used as reference gene.                          |
| AtACTIN2-R        | ACAAACGAGGGCTGGAACAA                         |           |                                                        |

**Supplementary Table 2. Accession numbers (No.) or transcript names of CHIP homologs from 16 animal and plant species.**

| Species                          | CHIP homolog | No. or Name        | Species                           | CHIP homolog | No. or Name              |
|----------------------------------|--------------|--------------------|-----------------------------------|--------------|--------------------------|
| <b>Animals</b>                   |              |                    |                                   |              |                          |
| <i>Homo sapiens</i>              | HsCHIP       | AAD33400           | <i>Danio rerio</i>                | DrCHIP       | NP_955968                |
| <i>Caenorhabditis elegans</i>    | CeCHIP       | NP_491781          | <i>Drosophila busckii</i>         | DbCHIP       | XP_017839474             |
| <i>Rattus norvegicus</i>         | RnCHIP       | NP_001020796       | <i>Xenopus tropicalis</i>         | XtCHIP       | NP_001072347             |
| <b>Plants</b>                    |              |                    |                                   |              |                          |
| <i>Arabidopsis thaliana</i>      | AtCHIP       | AT3G07370.1        | <i>Glycine max</i>                | GmCHIP1      | Glyma.03G088400.1        |
| <i>Chlamydomonas reinhardtii</i> | CrCHIP       | Cre11.g479650.t1.2 | <i>Glycine max</i>                | GmCHIP2      | Glyma.U008400.1          |
| <i>Brachypodium distachyon</i>   | BdCHIP1      | Bradi3g13620.1     | <i>Oropetium thomaeum</i>         | OtCHIP       | Oropetium_20150105_15229 |
| <i>Brachypodium distachyon</i>   | BdCHIP2      | Bradi2g39800.1     | <i>Oryza sativa</i>               | OsCHIP       | LOC_Os05g01460.1         |
| <i>Physcomitrium patens</i>      | PpCHIP1      | Pp3c14_2850V3.7    | <i>Selaginella moellendorffii</i> | SmCHIP       | Selaginella74711         |
| <i>Physcomitrium patens</i>      | PpCHIP2      | Pp3c10_2570V3.5    | <i>Solanum lycopersicum</i>       | SlCHIP       | Solyc06g083150.2.1       |
| <i>Zea mays</i>                  | ZmCHIP1      | Zm00008a023978_T01 | <i>Zea mays</i>                   | ZmCHIP2      | Zm00008a023494_T01       |
